# Supplementary material for: Assessment of Between-Hospital Variation in Readmission and Mortality After Cancer Surgical Procedures
Source: PubMed Central journal article supplement (PMC6324436; doi:10.1001/jamanetworkopen.2018.3038), 2018-10-05
Supplement: jamanetwopen-1-e183038-s001.pdf [file jamanetwopen-1-e183038-s001.pdf]

## Supplementary Online Content

Haneuse S, Dominici F, Normand S-L, Schrag D. Assessment of between-hospital variation in readmission and mortality after cancer surgical procedures. *JAMA Netw Open*. 2018;1(6):e183038. doi:10.1001/jamanetworkopen.2018.3038

**eFigure 1.** Flow Diagram of Patients in the Study

**eFigure 2.** Distributions of Performance Metrics Among 260 Hospitals With at Least 10 Cancer Surgery Patients per Year, on Average, for In-Hospital Mortality, 30-Day Post-Discharge Readmission and 90-Day Post-Discharge Mortality

**eTable 1.** Characteristics of the Study Patients at the Time of Surgery

**eTable 2.** Estimated Adjusted Odds Ratio and 95% Confidence Intervals From Hierarchical Mixed Effects Logistic Regression Analyses for In-Hospital Mortality

**eTable 3.** Estimated Adjusted Odds Ratio and 95% Confidence Intervals From Hierarchical Mixed Effects Logistic Regression Analyses for 90-Day Readmission and Mortality

**eTable 4.** Estimated Adjusted Odds Ratio and 95% Confidence Intervals From Hierarchical Mixed Effects Logistic Regression Analyses for 30-Day Readmission and Mortality

**eTable 5.** Estimates of the Random Effects Standard Deviation (SD), Median Odds Ratio and Hospital Odds Ratio Based on Hierarchical Logistic Regression Analyses of In-Hospital Mortality and 30- and 90-Day Post-Discharge Readmission and Mortality

This supplementary material has been provided by the authors to give readers additional information about their work.

**eFigure 1.** Flow Diagram of Patients in the Study.

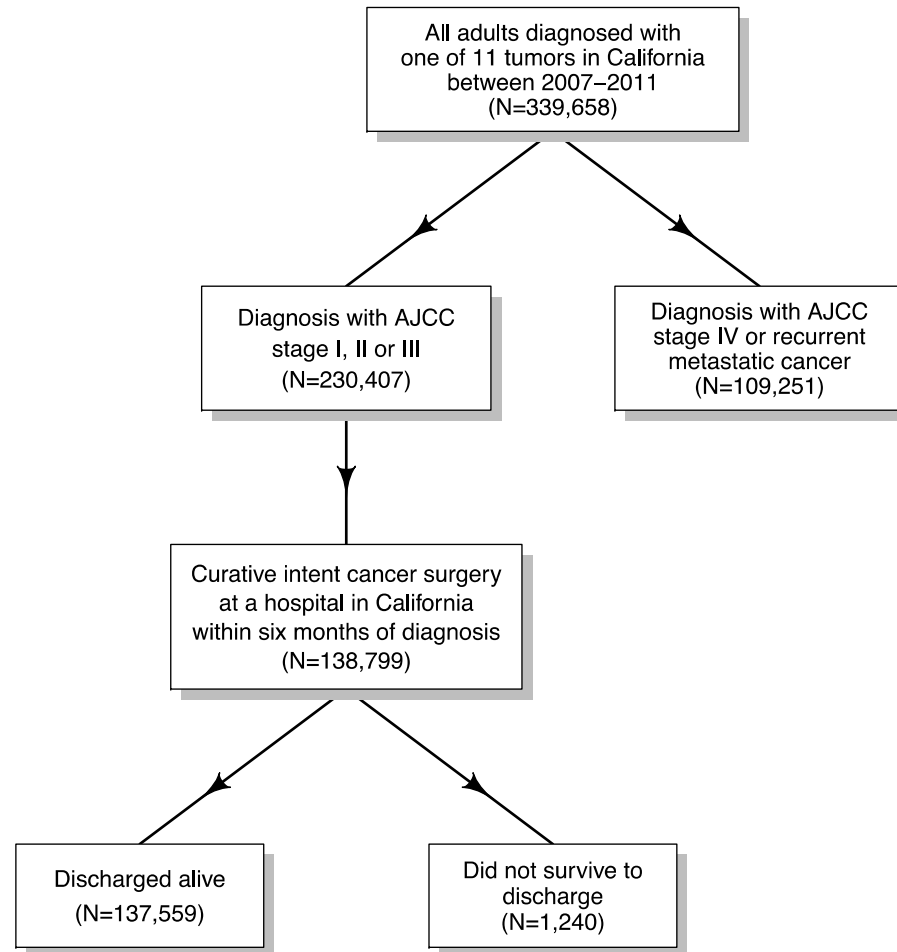

**eFigure 2.** Distributions of Performance Metrics Among 260 Hospitals With at Least 10 Cancer Surgery Patients per Year, on Average, for In-Hospital Mortality, 30-Day Post-Discharge Readmission and 90-Day Post-Discharge Mortality. The top row presents model-based hospital-specific risk rates and 95% confidence intervals (CI); green/red dots indicate that the 95% CI is entirely below/above, and red dots entirely above, the statewide rate. The middle row displays the number of hospitals in discrete categories of model-based risk-adjusted standardized rate (RASR) ratios. The bottom row presents bivariate scatter-plots for all three two-way combinations with each point representing a hospital; hospitals in the white (non-shaded) area had optimal performance with RASR ratios  $< 1.0$ , indicating lower than expected rates, for both outcomes; hospitals in the dark shaded region had RASR ratios  $> 1.0$ , indicating higher than expected rates, for both outcomes; hospitals in the light shaded region had lower than expected rates for one metric and higher than expected rates for the other.

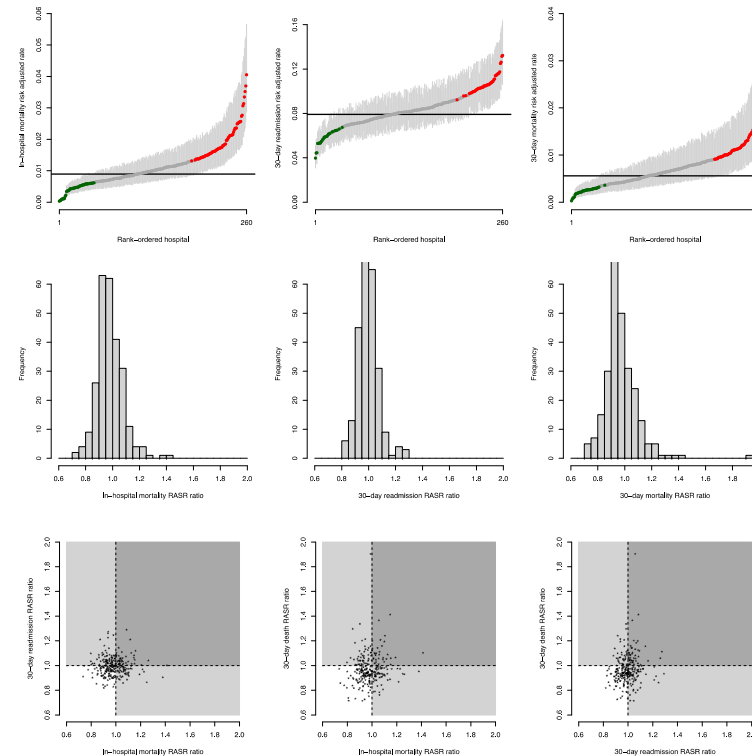

| <b>eTable 1. Characteristics of the Study Patients at the Time of Surgery</b> |  |                         |                |  |                           |         |  |                         |         |
|-------------------------------------------------------------------------------|--|-------------------------|----------------|--|---------------------------|---------|--|-------------------------|---------|
|                                                                               |  |                         |                |  |                           |         |  |                         |         |
|                                                                               |  | <b>Discharged alive</b> |                |  |                           |         |  |                         |         |
|                                                                               |  | <b>Overall</b>          |                |  | <b>30-day readmission</b> |         |  | <b>30-day mortality</b> |         |
|                                                                               |  | N                       | % <sup>a</sup> |  | N                         | Rate, % |  | N                       | Rate, % |
| <b>Total</b>                                                                  |  | 137,559                 |                |  | 10,880                    | 7.9     |  | 766                     | 0.6     |
| <b>Cancer type</b>                                                            |  |                         |                |  |                           |         |  |                         |         |
| Colorectal                                                                    |  | 27,203                  | 19.8           |  | 3,031                     | 11.1    |  | 401                     | 1.5     |
| Breast                                                                        |  | 30,356                  | 22.1           |  | 1,645                     | 5.4     |  | 32                      | 0.1     |
| Lung                                                                          |  | 8,695                   | 6.3            |  | 978                       | 11.2    |  | 115                     | 1.3     |
| Prostate                                                                      |  | 27,267                  | 19.8           |  | 981                       | 3.6     |  | 26                      | 0.1     |
| Bladder                                                                       |  | 1,888                   | 1.4            |  | 453                       | 24.0    |  | 24                      | 1.3     |
| Thyroid                                                                       |  | 10,530                  | 7.7            |  | 990                       | 9.4     |  | 2                       | 0.0     |
| Kidney                                                                        |  | 12,956                  | 9.4            |  | 994                       | 7.7     |  | 62                      | 0.5     |
| Endometrium                                                                   |  | 14,661                  | 10.7           |  | 1,035                     | 7.1     |  | 45                      | 0.3     |
| Pancreas                                                                      |  | 2,320                   | 1.7            |  | 470                       | 20.3    |  | 31                      | 1.3     |
| Liver                                                                         |  | 902                     | 0.7            |  | 163                       | 18.1    |  | 13                      | 1.4     |
| Esophagus                                                                     |  | 781                     | 0.6            |  | 140                       | 17.9    |  | 15                      | 1.9     |
| <b>AJCC stage</b>                                                             |  |                         |                |  |                           |         |  |                         |         |
| Stage I                                                                       |  | 55,693                  | 40.5           |  | 4,258                     | 7.6     |  | 203                     | 0.4     |
| Stage II                                                                      |  | 52,144                  | 37.9           |  | 3,728                     | 7.1     |  | 261                     | 0.5     |
| Stage III                                                                     |  | 29,722                  | 21.6           |  | 2,894                     | 9.7     |  | 302                     | 1.0     |
|                                                                               |  |                         |                |  |                           |         |  |                         |         |

|                                        | <b>Discharged alive</b> |                |                           |         |                         |         |  |  |
|----------------------------------------|-------------------------|----------------|---------------------------|---------|-------------------------|---------|--|--|
|                                        | <b>Overall</b>          |                | <b>30-day readmission</b> |         | <b>30-day mortality</b> |         |  |  |
|                                        | N                       | % <sup>a</sup> | N                         | Rate, % | N                       | Rate, % |  |  |
| <b>Sex</b>                             |                         |                |                           |         |                         |         |  |  |
| Male                                   | 58,352                  | 42.4           | 4,721                     | 8.1     | 391                     | 0.7     |  |  |
| Female                                 | 79,207                  | 57.6           | 6,159                     | 7.8     | 375                     | 0.5     |  |  |
| <b>Age, yrs</b>                        |                         |                |                           |         |                         |         |  |  |
| 18-44                                  | 12,364                  | 9.0            | 973                       | 7.9     | 3                       | 0.0     |  |  |
| 45-54                                  | 23,770                  | 17.3           | 1,514                     | 6.4     | 23                      | 0.1     |  |  |
| 55-64                                  | 38,742                  | 28.2           | 2,567                     | 6.6     | 97                      | 0.3     |  |  |
| 65-74                                  | 36,061                  | 26.2           | 2,818                     | 7.8     | 146                     | 0.4     |  |  |
| 75-84                                  | 20,108                  | 14.6           | 2,195                     | 10.9    | 276                     | 1.4     |  |  |
| 85+                                    | 6,514                   | 4.7            | 813                       | 12.5    | 221                     | 3.4     |  |  |
| <b>Charlson-Deyo score<sup>b</sup></b> |                         |                |                           |         |                         |         |  |  |
| 0                                      | 119,959                 | 87.2           | 8,084                     | 6.7     | 385                     | 0.3     |  |  |
| 1                                      | 8,315                   | 6.0            | 1,097                     | 13.2    | 119                     | 1.4     |  |  |
| 2+                                     | 9,285                   | 6.7            | 1,699                     | 18.3    | 262                     | 2.8     |  |  |
| <b>Type of admission<sup>c</sup></b>   |                         |                |                           |         |                         |         |  |  |
| Not scheduled                          | 17,105                  | 12.4           | 2,182                     | 12.8    | 332                     | 1.9     |  |  |
| Scheduled                              | 120,454                 | 87.6           | 8,698                     | 7.2     | 434                     | 0.4     |  |  |
| <b>Length of admission, days</b>       |                         |                |                           |         |                         |         |  |  |
| ≤ 1                                    | 40,282                  | 29.3           | 1,978                     | 4.9     | 20                      | 0.0     |  |  |

|                                   | <b>Discharged alive</b> |                |                           |         |                         |         |  |  |
|-----------------------------------|-------------------------|----------------|---------------------------|---------|-------------------------|---------|--|--|
|                                   | <b>Overall</b>          |                | <b>30-day readmission</b> |         | <b>30-day mortality</b> |         |  |  |
|                                   | N                       | % <sup>a</sup> | N                         | Rate, % | N                       | Rate, % |  |  |
| 2-4                               | 56,321                  | 40.9           | 3,286                     | 5.8     | 97                      | 0.2     |  |  |
| 5-7                               | 21,473                  | 15.6           | 2,126                     | 9.9     | 122                     | 0.6     |  |  |
| 8-14                              | 13,825                  | 10.1           | 2,161                     | 15.6    | 222                     | 1.6     |  |  |
| > 14                              | 5,658                   | 4.1            | 1,329                     | 23.5    | 305                     | 5.4     |  |  |
| <b>Disposition at discharge</b>   |                         |                |                           |         |                         |         |  |  |
| Home without services             | 117,085                 | 85.1           | 7,681                     | 6.6     | 224                     | 0.2     |  |  |
| Home with services                | 13,056                  | 9.5            | 1,687                     | 12.9    | 144                     | 1.1     |  |  |
| Skilled nursing/Intermediate care | 6,235                   | 4.5            | 1,294                     | 20.8    | 328                     | 5.3     |  |  |
| Other                             | 1,183                   | 0.9            | 218                       | 18.4    | 70                      | 5.9     |  |  |
| <b>Marital status</b>             |                         |                |                           |         |                         |         |  |  |
| Not Married                       | 52,883                  | 38.4           | 4,646                     | 8.8     | 440                     | 0.8     |  |  |
| Married                           | 84,676                  | 61.6           | 6,234                     | 7.4     | 326                     | 0.4     |  |  |
| <b>Race</b>                       |                         |                |                           |         |                         |         |  |  |
| White                             | 112,480                 | 81.8           | 8,914                     | 7.9     | 631                     | 0.6     |  |  |
| Black                             | 9,005                   | 6.5            | 863                       | 9.6     | 72                      | 0.8     |  |  |
| Asian                             | 14,987                  | 10.9           | 1,050                     | 7.0     | 57                      | 0.4     |  |  |
| American Indian                   | 615                     | 0.4            | 35                        | 5.7     | 4                       | 0.7     |  |  |
| Other                             | 472                     | 0.3            | 18                        | 3.8     | 2                       | 0.4     |  |  |
|                                   |                         |                |                           |         |                         |         |  |  |

|                                   | <b>Discharged alive</b> |                |                           |         |                         |         |  |  |
|-----------------------------------|-------------------------|----------------|---------------------------|---------|-------------------------|---------|--|--|
|                                   | <b>Overall</b>          |                | <b>30-day readmission</b> |         | <b>30-day mortality</b> |         |  |  |
|                                   | N                       | % <sup>a</sup> | N                         | Rate, % | N                       | Rate, % |  |  |
| <b>Hispanic</b>                   |                         |                |                           |         |                         |         |  |  |
| No                                | 115,081                 | 83.7           | 9,043                     | 7.9     | 680                     | 0.6     |  |  |
| Yes                               | 22,478                  | 16.3           | 1,837                     | 8.2     | 86                      | 0.4     |  |  |
| <b>Payer category</b>             |                         |                |                           |         |                         |         |  |  |
| Medicare                          | 56,914                  | 41.4           | 5,417                     | 9.5     | 599                     | 1.1     |  |  |
| Medicaid                          | 8,340                   | 6.1            | 842                       | 10.1    | 41                      | 0.5     |  |  |
| Commercial                        | 67,675                  | 49.2           | 4,224                     | 6.2     | 114                     | 0.2     |  |  |
| Other Indigent                    | 2,732                   | 2.0            | 219                       | 8.0     | 7                       | 0.3     |  |  |
| Self Pay/Other/Unknown            | 1,898                   | 1.4            | 178                       | 9.4     | 5                       | 0.3     |  |  |
| <b>Median income (\$1,000)</b>    |                         |                |                           |         |                         |         |  |  |
| < 50                              | 18,421                  | 13.4           | 1,384                     | 7.5     | 127                     | 0.7     |  |  |
| 50-59                             | 75,135                  | 54.6           | 6,164                     | 8.2     | 443                     | 0.6     |  |  |
| 60-69                             | 10,589                  | 7.7            | 816                       | 7.7     | 52                      | 0.5     |  |  |
| 70-79                             | 22,654                  | 16.5           | 1,722                     | 7.6     | 100                     | 0.4     |  |  |
| 80+                               | 10,760                  | 7.8            | 794                       | 7.4     | 44                      | 0.4     |  |  |
| <b>Percent below poverty line</b> |                         |                |                           |         |                         |         |  |  |
| < 10                              | 10,726                  | 7.8            | 765                       | 7.1     | 55                      | 0.5     |  |  |
| 10-14                             | 49,561                  | 36.0           | 3,792                     | 7.7     | 231                     | 0.5     |  |  |
| 15-19                             | 65,806                  | 47.8           | 5,497                     | 8.4     | 407                     | 0.6     |  |  |

|                                      | <b>Discharged alive</b> |                |                           |         |                         |         |  |  |
|--------------------------------------|-------------------------|----------------|---------------------------|---------|-------------------------|---------|--|--|
|                                      | <b>Overall</b>          |                | <b>30-day readmission</b> |         | <b>30-day mortality</b> |         |  |  |
|                                      | N                       | % <sup>a</sup> | N                         | Rate, % | N                       | Rate, % |  |  |
| 20+                                  | 11,466                  | 8.3            | 826                       | 7.2     | 73                      | 0.6     |  |  |
| <b>Average annual patient volume</b> |                         |                |                           |         |                         |         |  |  |
| 0-9                                  | 1,490                   | 1.1            | 169                       | 11.3    | 26                      | 1.7     |  |  |
| 10-49                                | 14,276                  | 10.4           | 1,253                     | 8.8     | 132                     | 0.9     |  |  |
| 50-99                                | 19,742                  | 14.4           | 1,600                     | 8.1     | 134                     | 0.7     |  |  |
| 100-199                              | 37,177                  | 27.0           | 2,884                     | 7.8     | 201                     | 0.5     |  |  |
| 200+                                 | 64,874                  | 47.2           | 4,974                     | 7.7     | 273                     | 0.4     |  |  |
| <b>Hospital type</b>                 |                         |                |                           |         |                         |         |  |  |
| Non-profit                           | 115,708                 | 84.1           | 8,945                     | 7.7     | 606                     | 0.5     |  |  |
| For-profit                           | 10,918                  | 7.9            | 964                       | 8.8     | 92                      | 0.8     |  |  |
| Public                               | 10,933                  | 7.9            | 971                       | 8.9     | 68                      | 0.6     |  |  |
| <b>Teaching hospital</b>             |                         |                |                           |         |                         |         |  |  |
| No                                   | 107,164                 | 77.9           | 8,225                     | 7.7     | 656                     | 0.6     |  |  |
| Yes                                  | 30,395                  | 22.1           | 2,655                     | 8.7     | 110                     | 0.4     |  |  |
| <b>Safety-net hospital</b>           |                         |                |                           |         |                         |         |  |  |
| No                                   | 129,419                 | 94.1           | 10,051                    | 7.8     | 721                     | 0.6     |  |  |
| Yes                                  | 8,140                   | 5.9            | 829                       | 10.2    | 45                      | 0.6     |  |  |
| <b>Critical access hospital</b>      |                         |                |                           |         |                         |         |  |  |
| No                                   | 136,794                 | 99.4           | 10,806                    | 7.9     | 756                     | 0.6     |  |  |



|                                                                                     | <b>Discharged alive</b> |                |                           |         |                         |         |  |  |  |
|-------------------------------------------------------------------------------------|-------------------------|----------------|---------------------------|---------|-------------------------|---------|--|--|--|
|                                                                                     | <b>Overall</b>          |                | <b>30-day readmission</b> |         | <b>30-day mortality</b> |         |  |  |  |
|                                                                                     | N                       | % <sup>a</sup> | N                         | Rate, % | N                       | Rate, % |  |  |  |
| Yes                                                                                 | 765                     | 0.6            | 74                        | 9.7     | 10                      | 1.3     |  |  |  |
| <b>NCI-designated cancer center</b>                                                 |                         |                |                           |         |                         |         |  |  |  |
| No                                                                                  | 121,556                 | 88.4           | 9,607                     | 7.9     | 726                     | 0.6     |  |  |  |
| Yes                                                                                 | 16,003                  | 11.6           | 1,273                     | 8.0     | 40                      | 0.2     |  |  |  |
| <b>Year</b>                                                                         |                         |                |                           |         |                         |         |  |  |  |
| 2007                                                                                | 23,817                  | 17.3           | 1,889                     | 7.9     | 112                     | 0.5     |  |  |  |
| 2008                                                                                | 29,144                  | 21.2           | 2,314                     | 7.9     | 176                     | 0.6     |  |  |  |
| 2009                                                                                | 29,174                  | 21.2           | 2,390                     | 8.2     | 155                     | 0.5     |  |  |  |
| 2010                                                                                | 28,515                  | 20.7           | 2,264                     | 7.9     | 175                     | 0.6     |  |  |  |
| 2011                                                                                | 26,909                  | 19.6           | 2,023                     | 7.5     | 148                     | 0.6     |  |  |  |
| <sup>a</sup> Column percentage                                                      |                         |                |                           |         |                         |         |  |  |  |
| <sup>b</sup> Range 0-25, with higher scores indicating greater co-morbidity burden. |                         |                |                           |         |                         |         |  |  |  |
| <sup>c</sup> Arranged with the hospital at least 24 hours prior to the admission    |                         |                |                           |         |                         |         |  |  |  |

**eTable 2.** Estimated Adjusted Odds Ratio (aOR) and 95% Confidence Intervals (CI) From Hierarchical Mixed Effects Logistic Regression Analyses for In-Hospital Mortality. Model 1 includes patient and tumor characteristics. Model 2 additionally includes hospital-level characteristics.

|                    |  | <b>In-hospital mortality</b> |              |                |              |
|--------------------|--|------------------------------|--------------|----------------|--------------|
|                    |  | <b>Model 1</b>               |              | <b>Model 2</b> |              |
|                    |  | aOR                          | 95% CI       | aOR            | 95% CI       |
| <b>Cancer type</b> |  |                              |              |                |              |
| Colorectum         |  | REF                          |              | REF            |              |
| Breast             |  | 0.10                         | (0.07, 0.16) | 0.10           | (0.07, 0.16) |
| Lung               |  | 2.01                         | (1.66, 2.42) | 2.06           | (1.7, 2.48)  |
| Prostate           |  | 0.05                         | (0.02, 0.08) | 0.05           | (0.03, 0.09) |
| Bladder            |  | 0.76                         | (0.51, 1.14) | 0.84           | (0.56, 1.26) |
| Thyroid            |  | 0.00                         | -            | 0.00           | -            |
| Kidney             |  | 0.72                         | (0.57, 0.92) | 0.75           | (0.59, 0.95) |
| Endometrium        |  | 0.31                         | (0.2, 0.47)  | 0.32           | (0.21, 0.49) |
| Pancreas           |  | 2.57                         | (1.99, 3.31) | 2.80           | (2.17, 3.62) |
| Liver              |  | 3.64                         | (2.51, 5.28) | 4.17           | (2.87, 6.06) |
| Esophagus          |  | 4.57                         | (3.25, 6.44) | 4.80           | (3.41, 6.75) |
| <b>AJCC stage</b>  |  |                              |              |                |              |
| Stage I            |  | REF                          |              | REF            |              |
| Stage II           |  | 1.70                         | (1.45, 2)    | 1.71           | (1.45, 2.01) |
| Stage III          |  | 1.92                         | (1.63, 2.27) | 1.94           | (1.65, 2.29) |

|                                        | <b>In-hospital mortality</b> |               |                |              |
|----------------------------------------|------------------------------|---------------|----------------|--------------|
|                                        | <b>Model 1</b>               |               | <b>Model 2</b> |              |
|                                        | aOR                          | 95% CI        | aOR            | 95% CI       |
| <b>Sex</b>                             |                              |               |                |              |
| Male                                   | REF                          |               | REF            |              |
| Female                                 | 0.61                         | (0.54, 0.7)   | 0.62           | (0.54, 0.7)  |
| <b>Age, yrs</b>                        |                              |               |                |              |
| 18-44                                  | REF                          |               | REF            |              |
| 45-54                                  | 1.34                         | (0.67, 2.7)   | 1.33           | (0.66, 2.69) |
| 55-64                                  | 2.41                         | (1.26, 4.6)   | 2.39           | (1.25, 4.57) |
| 65-74                                  | 3.76                         | (1.95, 7.22)  | 3.66           | (1.9, 7.05)  |
| 75-84                                  | 6.42                         | (3.33, 12.35) | 6.23           | (3.23, 12)   |
| 85+                                    | 10.41                        | (5.36, 20.19) | 10.10          | (5.2, 19.62) |
| <b>Charlson-Deyo score<sup>a</sup></b> |                              |               |                |              |
| 0                                      | REF                          |               | REF            |              |
| 1                                      | 1.40                         | (1.17, 1.67)  | 1.40           | (1.18, 1.67) |
| 2+                                     | 2.65                         | (2.31, 3.04)  | 2.67           | (2.33, 3.06) |
| <b>Type of admission<sup>b</sup></b>   |                              |               |                |              |
| Not scheduled                          | REF                          |               | REF            |              |
| Scheduled                              | 0.38                         | (0.33, 0.44)  | 0.40           | (0.35, 0.46) |
| <b>Marital status</b>                  |                              |               |                |              |
| Not Married                            | REF                          |               | REF            |              |
| Married                                | 0.88                         | (0.77, 0.99)  | 0.88           | (0.78, 1)    |

|                                | <b>In-hospital mortality</b> |              |                |              |
|--------------------------------|------------------------------|--------------|----------------|--------------|
|                                | <b>Model 1</b>               |              | <b>Model 2</b> |              |
|                                | aOR                          | 95% CI       | aOR            | 95% CI       |
| <b>Race</b>                    |                              |              |                |              |
| White                          | REF                          |              | REF            |              |
| Black                          | 1.11                         | (0.87, 1.41) | 1.11           | (0.87, 1.42) |
| Asian                          | 0.95                         | (0.77, 1.17) | 0.94           | (0.77, 1.16) |
| American Indian                | 1.16                         | (0.46, 2.89) | 1.13           | (0.45, 2.82) |
| Other                          | 0.41                         | (0.06, 2.99) | 0.38           | (0.05, 2.79) |
| <b>Hispanic</b>                |                              |              |                |              |
| No                             | REF                          |              | REF            |              |
| Yes                            | 0.96                         | (0.8, 1.14)  | 0.96           | (0.8, 1.15)  |
| <b>Payer category</b>          |                              |              |                |              |
| Medicare                       | REF                          |              | REF            |              |
| Medicaid                       | 0.97                         | (0.72, 1.31) | 0.98           | (0.72, 1.32) |
| Commercial                     | 0.78                         | (0.63, 0.97) | 0.78           | (0.63, 0.96) |
| Other Indigent                 | 0.64                         | (0.33, 1.23) | 0.64           | (0.33, 1.25) |
| Self Pay/Other/Unknown         | 1.41                         | (0.89, 2.24) | 1.39           | (0.87, 2.21) |
| <b>Median income (\$1,000)</b> |                              |              |                |              |
| < 50                           | 1.07                         | (0.82, 1.41) | 1.03           | (0.8, 1.33)  |
| 50-59                          | REF                          |              | REF            |              |
| 60-69                          | 0.83                         | (0.6, 1.15)  | 0.84           | (0.62, 1.15) |
| 70-79                          | 1.03                         | (0.79, 1.34) | 1.00           | (0.78, 1.28) |

|                                      | <b>In-hospital mortality</b> |              |                |              |
|--------------------------------------|------------------------------|--------------|----------------|--------------|
|                                      | <b>Model 1</b>               |              | <b>Model 2</b> |              |
|                                      | aOR                          | 95% CI       | aOR            | 95% CI       |
| 80+                                  | 1.18                         | (0.85, 1.66) | 1.13           | (0.83, 1.54) |
| <b>Percent below poverty line</b>    |                              |              |                |              |
| < 10                                 | 1.06                         | (0.81, 1.38) | 1.11           | (0.86, 1.43) |
| 10-14                                | REF                          |              | REF            |              |
| 15-19                                | 1.17                         | (0.94, 1.47) | 1.16           | (0.94, 1.43) |
| 20+                                  | 1.67                         | (1.15, 2.44) | 1.69           | (1.19, 2.4)  |
| <b>Hospital type</b>                 |                              |              |                |              |
| Non-profit                           |                              |              | REF            |              |
| For-profit                           |                              |              | 1.38           | (1.14, 1.67) |
| Public                               |                              |              | 1.21           | (0.95, 1.53) |
| <b>Average annual patient volume</b> |                              |              |                |              |
| 0-9                                  |                              |              | 1.30           | (0.91, 1.87) |
| 10-49                                |                              |              | REF            |              |
| 50-99                                |                              |              | 1.05           | (0.85, 1.29) |
| 100-199                              |                              |              | 1.04           | (0.85, 1.26) |
| 200+                                 |                              |              | 0.88           | (0.71, 1.1)  |
| <b>Teaching hospital</b>             |                              |              |                |              |
| No                                   |                              |              | REF            |              |
| Yes                                  |                              |              | 0.90           | (0.73, 1.11) |

|                                                                                     |  | <b>In-hospital mortality</b> |        |                |              |
|-------------------------------------------------------------------------------------|--|------------------------------|--------|----------------|--------------|
|                                                                                     |  | <b>Model 1</b>               |        | <b>Model 2</b> |              |
|                                                                                     |  | aOR                          | 95% CI | aOR            | 95% CI       |
| <b>Safety-net hospital</b>                                                          |  |                              |        |                |              |
| No                                                                                  |  |                              |        | REF            |              |
| Yes                                                                                 |  |                              |        | 0.82           | (0.62, 1.09) |
| <b>Critical access hospital</b>                                                     |  |                              |        |                |              |
| No                                                                                  |  |                              |        | REF            |              |
| Yes                                                                                 |  |                              |        | 1.23           | (0.72, 2.09) |
| <b>NCI-designated cancer center</b>                                                 |  |                              |        |                |              |
| No                                                                                  |  |                              |        | REF            |              |
| Yes                                                                                 |  |                              |        | 0.81           | (0.6, 1.09)  |
| <sup>a</sup> Range 0-25, with higher scores indicating greater co-morbidity burden. |  |                              |        |                |              |
| <sup>b</sup> Arranged with the hospital at least 24 hours prior to the admission    |  |                              |        |                |              |

**eTable 3.** Estimated Adjusted Odds Ratio and 95% Confidence Intervals From Hierarchical Mixed Effects Logistic Regression Analyses for 90-Day Readmission and Mortality. Model 1 includes patient and tumor characteristics. Model 2 additionally includes hospital-level characteristics.

|                    | 90-day readmission |              |         |              | 90-day mortality |              |         |              |
|--------------------|--------------------|--------------|---------|--------------|------------------|--------------|---------|--------------|
|                    | Model 1            |              | Model 2 |              | Model 1          |              | Model 2 |              |
|                    | aOR                | 95% CI       | aOR     | 95% CI       | aOR              | 95% CI       | aOR     | 95% CI       |
| <b>Cancer type</b> |                    |              |         |              |                  |              |         |              |
| Colorectum         | REF                |              | REF     |              | REF              |              | REF     |              |
| Breast             | 0.97               | (0.92, 1.03) | 0.97    | (0.92, 1.03) | 0.54             | (0.44, 0.66) | 0.54    | (0.44, 0.66) |
| Lung               | 1.33               | (1.24, 1.42) | 1.33    | (1.24, 1.42) | 2.40             | (2.03, 2.83) | 2.47    | (2.09, 2.92) |
| Prostate           | 0.33               | (0.31, 0.36) | 0.33    | (0.31, 0.36) | 0.21             | (0.15, 0.29) | 0.21    | (0.15, 0.3)  |
| Bladder            | 2.14               | (1.92, 2.39) | 2.14    | (1.91, 2.38) | 1.72             | (1.32, 2.23) | 1.82    | (1.4, 2.37)  |
| Thyroid            | 2.93               | (2.75, 3.13) | 2.93    | (2.74, 3.13) | 0.21             | (0.11, 0.43) | 0.22    | (0.11, 0.44) |
| Kidney             | 0.88               | (0.83, 0.94) | 0.88    | (0.83, 0.94) | 0.89             | (0.72, 1.1)  | 0.92    | (0.75, 1.14) |
| Endometrium        | 1.08               | (1.01, 1.16) | 1.08    | (1.01, 1.16) | 1.11             | (0.88, 1.4)  | 1.14    | (0.9, 1.43)  |
| Pancreas           | 2.06               | (1.86, 2.28) | 2.05    | (1.85, 2.27) | 2.42             | (1.88, 3.11) | 2.56    | (1.99, 3.3)  |
| Liver              | 1.81               | (1.54, 2.13) | 1.80    | (1.53, 2.12) | 3.20             | (2.15, 4.74) | 3.51    | (2.36, 5.22) |
| Esophagus          | 1.66               | (1.40, 1.96) | 1.65    | (1.39, 1.95) | 2.48             | (1.7, 3.63)  | 2.58    | (1.76, 3.77) |
| <b>AJCC stage</b>  |                    |              |         |              |                  |              |         |              |
| Stage I            | REF                |              | REF     |              | REF              |              | REF     |              |
| Stage II           | 1.22               | (1.17, 1.28) | 1.22    | (1.17, 1.28) | 1.48             | (1.28, 1.7)  | 1.48    | (1.29, 1.71) |
| Stage III          | 1.53               | (1.47, 1.60) | 1.53    | (1.47, 1.6)  | 2.49             | (2.17, 2.84) | 2.49    | (2.18, 2.85) |

|                                        | 90-day readmission |              |         |              |         | 90-day mortality |         |              |  |  |
|----------------------------------------|--------------------|--------------|---------|--------------|---------|------------------|---------|--------------|--|--|
|                                        | Model 1            |              | Model 2 |              | Model 1 |                  | Model 2 |              |  |  |
|                                        | aOR                | 95% CI       | aOR     | 95% CI       | aOR     | 95% CI           | aOR     | 95% CI       |  |  |
| <b>Sex</b>                             |                    |              |         |              |         |                  |         |              |  |  |
| Male                                   | REF                |              | REF     |              | REF     |                  | REF     |              |  |  |
| Female                                 | 0.88               | (0.85, 0.92) | 0.89    | (0.85, 0.92) | 0.75    | (0.67, 0.85)     | 0.75    | (0.67, 0.84) |  |  |
| <b>Age, yrs</b>                        |                    |              |         |              |         |                  |         |              |  |  |
| 18-44                                  | REF                |              | REF     |              | REF     |                  | REF     |              |  |  |
| 45-54                                  | 0.85               | (0.79, 0.9)  | 0.85    | (0.79, 0.9)  | 1.99    | (1.07, 3.68)     | 1.99    | (1.07, 3.69) |  |  |
| 55-64                                  | 0.84               | (0.79, 0.89) | 0.84    | (0.79, 0.89) | 3.51    | (1.95, 6.31)     | 3.51    | (1.95, 6.31) |  |  |
| 65-74                                  | 0.83               | (0.77, 0.9)  | 0.84    | (0.78, 0.9)  | 4.01    | (2.21, 7.27)     | 4.00    | (2.21, 7.25) |  |  |
| 75-84                                  | 0.85               | (0.78, 0.93) | 0.86    | (0.79, 0.93) | 6.92    | (3.81, 12.57)    | 6.90    | (3.8, 12.53) |  |  |
| 85+                                    | 0.81               | (0.73, 0.9)  | 0.81    | (0.74, 0.9)  | 11.21   | (6.14, 20.49)    | 11.14   | (6.1, 20.37) |  |  |
| <b>Charlson-Deyo score<sup>a</sup></b> |                    |              |         |              |         |                  |         |              |  |  |
| 0                                      | REF                |              | REF     |              | REF     |                  | REF     |              |  |  |
| 1                                      | 1.39               | (1.31, 1.47) | 1.39    | (1.31, 1.47) | 1.33    | (1.15, 1.54)     | 1.33    | (1.14, 1.54) |  |  |
| 2+                                     | 2.00               | (1.89, 2.11) | 2.00    | (1.9, 2.11)  | 1.96    | (1.73, 2.22)     | 1.96    | (1.73, 2.21) |  |  |
| <b>Type of admission<sup>b</sup></b>   |                    |              |         |              |         |                  |         |              |  |  |
| Not scheduled                          | REF                |              | REF     |              | REF     |                  | REF     |              |  |  |
| Scheduled                              | 0.85               | (0.81, 0.89) | 0.85    | (0.81, 0.89) | 0.59    | (0.52, 0.67)     | 0.59    | (0.52, 0.67) |  |  |
| <b>Disposition at discharge</b>        |                    |              |         |              |         |                  |         |              |  |  |
| Home without services                  | REF                |              | REF     |              | REF     |                  | REF     |              |  |  |
| Home with services                     | 1.46               | (1.38, 1.53) | 1.46    | (1.39, 1.54) | 1.91    | (1.65, 2.21)     | 1.92    | (1.65, 2.22) |  |  |



|                                   | 90-day readmission |              |         |              |         | 90-day mortality |         |              |  |  |
|-----------------------------------|--------------------|--------------|---------|--------------|---------|------------------|---------|--------------|--|--|
|                                   | Model 1            |              | Model 2 |              | Model 1 |                  | Model 2 |              |  |  |
|                                   | aOR                | 95% CI       | aOR     | 95% CI       | aOR     | 95% CI           | aOR     | 95% CI       |  |  |
| Skilled nursing/Intermediate care | 2.21               | (2.07, 2.36) | 2.22    | (2.08, 2.37) | 5.34    | (4.65, 6.12)     | 5.33    | (4.64, 6.11) |  |  |
| Other                             | 2.04               | (1.79, 2.33) | 2.04    | (1.79, 2.33) | 6.98    | (5.61, 8.68)     | 6.92    | (5.56, 8.61) |  |  |
| <b>Marital status</b>             |                    |              |         |              |         |                  |         |              |  |  |
| Not Married                       | REF                |              | REF     |              | REF     |                  | REF     |              |  |  |
| Married                           | 1.03               | (1, 1.07)    | 1.03    | (1, 1.07)    | 0.94    | (0.84, 1.04)     | 0.94    | (0.84, 1.05) |  |  |
| <b>Race</b>                       |                    |              |         |              |         |                  |         |              |  |  |
| White                             | REF                |              | REF     |              | REF     |                  | REF     |              |  |  |
| Black                             | 1.17               | (1.1, 1.25)  | 1.17    | (1.1, 1.25)  | 1.31    | (1.08, 1.59)     | 1.30    | (1.06, 1.58) |  |  |
| Asian                             | 0.83               | (0.79, 0.88) | 0.83    | (0.78, 0.88) | 0.83    | (0.68, 1)        | 0.82    | (0.68, 1)    |  |  |
| American Indian                   | 0.60               | (0.45, 0.79) | 0.60    | (0.45, 0.79) | 2.17    | (1.14, 4.12)     | 2.14    | (1.12, 4.07) |  |  |
| Other                             | 0.46               | (0.31, 0.67) | 0.46    | (0.32, 0.67) | 1.25    | (0.44, 3.5)      | 1.24    | (0.44, 3.47) |  |  |
| <b>Hispanic</b>                   |                    |              |         |              |         |                  |         |              |  |  |
| No                                | REF                |              | REF     |              | REF     |                  | REF     |              |  |  |
| Yes                               | 1.05               | (1, 1.1)     | 1.04    | (1, 1.09)    | 0.87    | (0.74, 1.02)     | 0.86    | (0.73, 1.01) |  |  |
| <b>Payer category</b>             |                    |              |         |              |         |                  |         |              |  |  |
| Medicare                          | REF                |              | REF     |              | REF     |                  | REF     |              |  |  |
| Medicaid                          | 1.08               | (1, 1.17)    | 1.05    | (0.97, 1.14) | 1.32    | (1.03, 1.68)     | 1.32    | (1.03, 1.69) |  |  |
| Commercial                        | 0.86               | (0.81, 0.91) | 0.86    | (0.82, 0.91) | 0.85    | (0.71, 1.02)     | 0.86    | (0.72, 1.02) |  |  |
| Other Indigent                    | 0.87               | (0.77, 0.99) | 0.84    | (0.74, 0.95) | 0.88    | (0.54, 1.44)     | 0.89    | (0.54, 1.46) |  |  |

|                                      | 90-day readmission |              |         |              |         | 90-day mortality |         |              |  |  |
|--------------------------------------|--------------------|--------------|---------|--------------|---------|------------------|---------|--------------|--|--|
|                                      | Model 1            |              | Model 2 |              | Model 1 |                  | Model 2 |              |  |  |
|                                      | aOR                | 95% CI       | aOR     | 95% CI       | aOR     | 95% CI           | aOR     | 95% CI       |  |  |
| Self Pay/Other/Unknown               | 0.94               | (0.82, 1.08) | 0.92    | (0.8, 1.06)  | 0.73    | (0.41, 1.3)      | 0.73    | (0.41, 1.3)  |  |  |
| <b>Median income (\$1,000)</b>       |                    |              |         |              |         |                  |         |              |  |  |
| < 50                                 | 0.89               | (0.81, 0.98) | 0.91    | (0.82, 1)    | 0.95    | (0.74, 1.21)     | 0.94    | (0.74, 1.2)  |  |  |
| 50-59                                | REF                |              | REF     |              | REF     |                  | REF     |              |  |  |
| 60-69                                | 1.07               | (0.97, 1.19) | 1.08    | (0.97, 1.2)  | 0.89    | (0.68, 1.16)     | 0.88    | (0.67, 1.15) |  |  |
| 70-79                                | 1.11               | (1.01, 1.22) | 1.11    | (1.01, 1.21) | 0.84    | (0.66, 1.06)     | 0.85    | (0.68, 1.07) |  |  |
| 80+                                  | 1.04               | (0.92, 1.17) | 1.04    | (0.92, 1.16) | 0.80    | (0.59, 1.09)     | 0.80    | (0.59, 1.09) |  |  |
| <b>Percent below poverty line</b>    |                    |              |         |              |         |                  |         |              |  |  |
| < 10                                 | 0.92               | (0.85, 1)    | 0.93    | (0.86, 1.01) | 0.96    | (0.75, 1.23)     | 0.96    | (0.76, 1.23) |  |  |
| 10-14                                | REF                |              | REF     |              | REF     |                  | REF     |              |  |  |
| 15-19                                | 1.13               | (1.04, 1.23) | 1.13    | (1.04, 1.22) | 1.04    | (0.86, 1.26)     | 1.05    | (0.87, 1.27) |  |  |
| 20+                                  | 1.15               | (1, 1.31)    | 1.13    | (0.99, 1.29) | 1.28    | (0.91, 1.8)      | 1.25    | (0.9, 1.76)  |  |  |
| <b>Hospital type</b>                 |                    |              |         |              |         |                  |         |              |  |  |
| Non-profit                           |                    |              | REF     |              |         |                  | REF     |              |  |  |
| For-profit                           |                    |              | 1.05    | (0.96, 1.15) |         |                  | 0.92    | (0.76, 1.12) |  |  |
| Public                               |                    |              | 1.05    | (0.95, 1.17) |         |                  | 1.18    | (0.94, 1.47) |  |  |
| <b>Average annual patient volume</b> |                    |              |         |              |         |                  |         |              |  |  |
| 0-9                                  |                    |              | 1.10    | (0.94, 1.28) |         |                  | 1.23    | (0.87, 1.73) |  |  |

|                                                                                     | 90-day readmission |        |         |              |         | 90-day mortality |         |              |  |  |
|-------------------------------------------------------------------------------------|--------------------|--------|---------|--------------|---------|------------------|---------|--------------|--|--|
|                                                                                     | Model 1            |        | Model 2 |              | Model 1 |                  | Model 2 |              |  |  |
|                                                                                     | aOR                | 95% CI | aOR     | 95% CI       | aOR     | 95% CI           | aOR     | 95% CI       |  |  |
| 10-49                                                                               |                    |        | REF     |              |         |                  | REF     |              |  |  |
| 50-99                                                                               |                    |        | 1.02    | (0.93, 1.11) |         |                  | 0.89    | (0.73, 1.08) |  |  |
| 100-199                                                                             |                    |        | 1.01    | (0.93, 1.1)  |         |                  | 0.87    | (0.72, 1.05) |  |  |
| 200+                                                                                |                    |        | 1.06    | (0.97, 1.17) |         |                  | 0.94    | (0.77, 1.15) |  |  |
| <b>Teaching hospital</b>                                                            |                    |        |         |              |         |                  |         |              |  |  |
| No                                                                                  |                    |        | REF     |              |         |                  | REF     |              |  |  |
| Yes                                                                                 |                    |        | 1.13    | (1.03, 1.25) |         |                  | 0.87    | (0.71, 1.07) |  |  |
| <b>Safety-net hospital</b>                                                          |                    |        |         |              |         |                  |         |              |  |  |
| No                                                                                  |                    |        | REF     |              |         |                  | REF     |              |  |  |
| Yes                                                                                 |                    |        | 1.14    | (1.01, 1.28) |         |                  | 0.97    | (0.74, 1.26) |  |  |
| <b>Critical access hospital</b>                                                     |                    |        |         |              |         |                  |         |              |  |  |
| No                                                                                  |                    |        | REF     |              |         |                  | REF     |              |  |  |
| Yes                                                                                 |                    |        | 1.19    | (0.93, 1.51) |         |                  | 1.04    | (0.59, 1.82) |  |  |
| <b>NCI-designated cancer center</b>                                                 |                    |        |         |              |         |                  |         |              |  |  |
| No                                                                                  |                    |        | REF     |              |         |                  | REF     |              |  |  |
| Yes                                                                                 |                    |        | 0.92    | (0.8, 1.07)  |         |                  | 0.76    | (0.57, 1.01) |  |  |
| <sup>a</sup> Range 0-25, with higher scores indicating greater co-morbidity burden. |                    |        |         |              |         |                  |         |              |  |  |
| <sup>b</sup> Arranged with the hospital at least 24 hours prior to the admission    |                    |        |         |              |         |                  |         |              |  |  |

**eTable 4.** Estimated Adjusted Odds Ratio and 95% Confidence Intervals From Hierarchical Mixed Effects Logistic Regression Analyses for 30-Day Readmission and Mortality. Model 1 includes patient and tumor characteristics. Model 2 additionally includes hospital-level characteristics.

|                    | 30-readmission |              |                |              | 30-day mortality |              |                |              |
|--------------------|----------------|--------------|----------------|--------------|------------------|--------------|----------------|--------------|
|                    | <u>Model 1</u> |              | <u>Model 2</u> |              | <u>Model 1</u>   |              | <u>Model 2</u> |              |
|                    | aOR            | 95% CI       | aOR            | 95% CI       | aOR              | 95% CI       | aOR            | 95% CI       |
| <b>Cancer type</b> |                |              |                |              |                  |              |                |              |
| Colorectum         | REF            |              | REF            |              | REF              |              | REF            |              |
| Breast             | 0.68           | (0.63, 0.73) | 0.68           | (0.63, 0.73) | 0.30             | (0.21, 0.45) | 0.30           | (0.21, 0.45) |
| Lung               | 1.16           | (1.07, 1.26) | 1.16           | (1.07, 1.26) | 1.85             | (1.45, 2.37) | 1.93           | (1.51, 2.48) |
| Prostate           | 0.40           | (0.36, 0.44) | 0.40           | (0.36, 0.43) | 0.30             | (0.2, 0.47)  | 0.32           | (0.2, 0.5)   |
| Bladder            | 2.19           | (1.94, 2.47) | 2.17           | (1.92, 2.45) | 0.96             | (0.62, 1.5)  | 1.06           | (0.68, 1.65) |
| Thyroid            | 1.33           | (1.21, 1.45) | 1.32           | (1.21, 1.45) | 0.13             | (0.03, 0.54) | 0.14           | (0.03, 0.56) |
| Kidney             | 0.83           | (0.77, 0.9)  | 0.83           | (0.77, 0.9)  | 0.97             | (0.72, 1.3)  | 1.01           | (0.76, 1.36) |
| Endometrium        | 0.96           | (0.88, 1.04) | 0.95           | (0.87, 1.04) | 1.01             | (0.71, 1.42) | 1.04           | (0.74, 1.48) |
| Pancreas           | 2.08           | (1.85, 2.33) | 2.05           | (1.83, 2.31) | 1.64             | (1.1, 2.44)  | 1.78           | (1.2, 2.66)  |
| Liver              | 1.86           | (1.54, 2.23) | 1.83           | (1.52, 2.2)  | 2.40             | (1.32, 4.38) | 2.79           | (1.52, 5.13) |
| Esophagus          | 1.58           | (1.3, 1.92)  | 1.57           | (1.29, 1.91) | 2.06             | (1.18, 3.57) | 2.16           | (1.24, 3.76) |
| <b>AJCC stage</b>  |                |              |                |              |                  |              |                |              |
| Stage I            | REF            |              | REF            |              | REF              |              | REF            |              |
| Stage II           | 1.09           | (1.03, 1.15) | 1.09           | (1.03, 1.15) | 1.24             | (1, 1.52)    | 1.24           | (1.01, 1.53) |
| Stage III          | 1.26           | (1.19, 1.33) | 1.26           | (1.19, 1.33) | 1.93             | (1.58, 2.35) | 1.94           | (1.59, 2.36) |

|                                        | 30-readmission |              |         |              | 30-day mortality |               |         |               |
|----------------------------------------|----------------|--------------|---------|--------------|------------------|---------------|---------|---------------|
|                                        | Model 1        |              | Model 2 |              | Model 1          |               | Model 2 |               |
|                                        | aOR            | 95% CI       | aOR     | 95% CI       | aOR              | 95% CI        | aOR     | 95% CI        |
| <b>Sex</b>                             |                |              |         |              |                  |               |         |               |
| Male                                   | REF            |              | REF     |              | REF              |               | REF     |               |
| Female                                 | 0.84           | (0.8, 0.89)  | 0.84    | (0.8, 0.89)  | 0.65             | (0.55, 0.77)  | 0.64    | (0.54, 0.76)  |
| <b>Age, yrs</b>                        |                |              |         |              |                  |               |         |               |
| 18-44                                  | REF            |              | REF     |              | REF              |               | REF     |               |
| 45-54                                  | 0.85           | (0.78, 0.93) | 0.85    | (0.78, 0.93) | 2.46             | (0.74, 8.25)  | 2.47    | (0.74, 8.27)  |
| 55-64                                  | 0.89           | (0.82, 0.97) | 0.89    | (0.82, 0.97) | 5.30             | (1.67, 16.84) | 5.30    | (1.67, 16.82) |
| 65-74                                  | 0.85           | (0.77, 0.94) | 0.86    | (0.77, 0.95) | 5.17             | (1.61, 16.58) | 5.12    | (1.6, 16.44)  |
| 75-84                                  | 0.89           | (0.8, 1)     | 0.90    | (0.81, 1)    | 9.74             | (3.03, 31.27) | 9.63    | (3, 30.91)    |
| 85+                                    | 0.87           | (0.76, 0.99) | 0.87    | (0.77, 0.99) | 16.16            | (5, 52.23)    | 15.95   | (4.94, 51.54) |
| <b>Charlson-Deyo score<sup>a</sup></b> |                |              |         |              |                  |               |         |               |
| 0                                      | REF            |              | REF     |              | REF              |               | REF     |               |
| 1                                      | 1.35           | (1.26, 1.46) | 1.35    | (1.26, 1.46) | 1.27             | (1.01, 1.58)  | 1.27    | (1.01, 1.58)  |
| 2+                                     | 1.81           | (1.69, 1.93) | 1.81    | (1.7, 1.93)  | 1.79             | (1.49, 2.15)  | 1.79    | (1.49, 2.15)  |
| <b>Type of admission<sup>b</sup></b>   |                |              |         |              |                  |               |         |               |
| Not scheduled                          | REF            |              | REF     |              | REF              |               | REF     |               |
| Scheduled                              | 0.89           | (0.84, 0.95) | 0.90    | (0.85, 0.95) | 0.68             | (0.56, 0.81)  | 0.68    | (0.57, 0.82)  |
|                                        |                |              |         |              |                  |               |         |               |
|                                        |                |              |         |              |                  |               |         |               |

|                                   | 30-readmission |              |         |              | 30-day mortality |               |         |               |
|-----------------------------------|----------------|--------------|---------|--------------|------------------|---------------|---------|---------------|
|                                   | Model 1        |              | Model 2 |              | Model 1          |               | Model 2 |               |
|                                   | aOR            | 95% CI       | aOR     | 95% CI       | aOR              | 95% CI        | aOR     | 95% CI        |
| <b>Disposition at discharge</b>   |                |              |         |              |                  |               |         |               |
| Home without services             | REF            |              | REF     |              | REF              |               | REF     |               |
| Home with services                | 1.47           | (1.38, 1.56) | 1.47    | (1.38, 1.57) | 2.42             | (1.93, 3.05)  | 2.44    | (1.94, 3.07)  |
| Skilled nursing/Intermediate care | 2.19           | (2.03, 2.37) | 2.20    | (2.03, 2.37) | 6.75             | (5.47, 8.32)  | 6.74    | (5.47, 8.32)  |
| Other                             | 1.97           | (1.69, 2.3)  | 1.96    | (1.68, 2.29) | 9.67             | (7.16, 13.06) | 9.61    | (7.11, 12.99) |
| <b>Marital status</b>             |                |              |         |              |                  |               |         |               |
| Not Married                       | REF            |              | REF     |              | REF              |               | REF     |               |
| Married                           | 1.02           | (0.97, 1.06) | 1.02    | (0.98, 1.06) | 0.83             | (0.71, 0.98)  | 0.84    | (0.71, 0.98)  |
| <b>Race</b>                       |                |              |         |              |                  |               |         |               |
| White                             | REF            |              | REF     |              | REF              |               | REF     |               |
| Black                             | 1.22           | (1.13, 1.33) | 1.22    | (1.13, 1.32) | 1.59             | (1.22, 2.08)  | 1.57    | (1.2, 2.05)   |
| Asian                             | 0.83           | (0.78, 0.89) | 0.83    | (0.77, 0.89) | 0.82             | (0.61, 1.1)   | 0.82    | (0.61, 1.09)  |
| American Indian                   | 0.74           | (0.53, 1.05) | 0.74    | (0.52, 1.05) | 1.71             | (0.61, 4.79)  | 1.66    | (0.59, 4.68)  |
| Other                             | 0.54           | (0.34, 0.88) | 0.54    | (0.34, 0.88) | 1.45             | (0.34, 6.08)  | 1.42    | (0.34, 5.95)  |
|                                   |                |              |         |              |                  |               |         |               |
|                                   |                |              |         |              |                  |               |         |               |

|                                       | 30-readmission |              |         |              | 30-day mortality |              |         |              |
|---------------------------------------|----------------|--------------|---------|--------------|------------------|--------------|---------|--------------|
|                                       | Model 1        |              | Model 2 |              | Model 1          |              | Model 2 |              |
|                                       | aOR            | 95% CI       | aOR     | 95% CI       | aOR              | 95% CI       | aOR     | 95% CI       |
| <b>Hispanic</b>                       |                |              |         |              |                  |              |         |              |
| No                                    | REF            |              | REF     |              | REF              |              | REF     |              |
| Yes                                   | 1.03           | (0.97, 1.09) | 1.02    | (0.96, 1.08) | 0.87             | (0.68, 1.1)  | 0.86    | (0.67, 1.09) |
| <b>Payer category</b>                 |                |              |         |              |                  |              |         |              |
| Medicare                              | REF            |              | REF     |              | REF              |              | REF     |              |
| Medicaid                              | 1.17           | (1.06, 1.29) | 1.13    | (1.02, 1.24) | 1.35             | (0.94, 1.94) | 1.35    | (0.93, 1.96) |
| Commercial                            | 0.86           | (0.8, 0.93)  | 0.87    | (0.81, 0.93) | 0.81             | (0.62, 1.06) | 0.81    | (0.62, 1.06) |
| Other Indigent                        | 0.88           | (0.75, 1.03) | 0.84    | (0.71, 0.98) | 0.72             | (0.33, 1.6)  | 0.73    | (0.33, 1.63) |
| Self<br>Pay/Other/Unknown             | 1.02           | (0.86, 1.2)  | 0.98    | (0.83, 1.17) | 0.69             | (0.28, 1.7)  | 0.69    | (0.28, 1.71) |
| <b>Median income<br/>(\$1,000)</b>    |                |              |         |              |                  |              |         |              |
| < 50                                  | 0.93           | (0.83, 1.03) | 0.95    | (0.85, 1.05) | 1.22             | (0.88, 1.69) | 1.22    | (0.88, 1.69) |
| 50-59                                 | REF            |              | REF     |              | REF              |              | REF     |              |
| 60-69                                 | 1.03           | (0.92, 1.16) | 1.04    | (0.93, 1.16) | 0.87             | (0.59, 1.29) | 0.87    | (0.59, 1.29) |
| 70-79                                 | 1.05           | (0.95, 1.16) | 1.04    | (0.94, 1.14) | 0.78             | (0.56, 1.1)  | 0.80    | (0.57, 1.12) |
| 80+                                   | 1.07           | (0.94, 1.21) | 1.05    | (0.93, 1.19) | 0.82             | (0.53, 1.28) | 0.83    | (0.54, 1.28) |
| <b>Percent below<br/>poverty line</b> |                |              |         |              |                  |              |         |              |
| < 10                                  | 0.89           | (0.81, 0.98) | 0.91    | (0.82, 1)    | 1.13             | (0.8, 1.61)  | 1.15    | (0.81, 1.63) |

|                                      | 30-readmission |              |         |              | 30-day mortality |              |         |              |
|--------------------------------------|----------------|--------------|---------|--------------|------------------|--------------|---------|--------------|
|                                      | Model 1        |              | Model 2 |              | Model 1          |              | Model 2 |              |
|                                      | aOR            | 95% CI       | aOR     | 95% CI       | aOR              | 95% CI       | aOR     | 95% CI       |
| 10-14                                | REF            |              | REF     |              | REF              |              | REF     |              |
| 15-19                                | 1.07           | (0.98, 1.17) | 1.06    | (0.98, 1.16) | 1.11             | (0.85, 1.46) | 1.12    | (0.86, 1.47) |
| 20+                                  | 1.03           | (0.89, 1.2)  | 1.01    | (0.87, 1.17) | 1.12             | (0.7, 1.8)   | 1.08    | (0.68, 1.72) |
| <b>Hospital type</b>                 |                |              |         |              |                  |              |         |              |
| Non-profit                           |                |              | REF     |              |                  |              | REF     |              |
| For-profit                           |                |              | 1.06    | (0.97, 1.17) |                  |              | 0.94    | (0.71, 1.23) |
| Public                               |                |              | 1.08    | (0.97, 1.2)  |                  |              | 1.28    | (0.94, 1.74) |
| <b>Average annual patient volume</b> |                |              |         |              |                  |              |         |              |
| 0-9                                  |                |              | 1.09    | (0.91, 1.32) |                  |              | 1.27    | (0.79, 2.02) |
| 10-49                                |                |              | REF     |              |                  |              | REF     |              |
| 50-99                                |                |              | 0.98    | (0.89, 1.07) |                  |              | 0.88    | (0.67, 1.15) |
| 100-199                              |                |              | 0.98    | (0.9, 1.07)  |                  |              | 0.82    | (0.63, 1.06) |
| 200+                                 |                |              | 1.05    | (0.95, 1.15) |                  |              | 0.99    | (0.75, 1.32) |
| <b>Teaching hospital</b>             |                |              |         |              |                  |              |         |              |
| No                                   |                |              | REF     |              |                  |              | REF     |              |
| Yes                                  |                |              | 1.09    | (1, 1.19)    |                  |              | 0.80    | (0.6, 1.07)  |
| <b>Safety-net hospital</b>           |                |              |         |              |                  |              |         |              |
| No                                   |                |              | REF     |              |                  |              | REF     |              |
| Yes                                  |                |              | 1.13    | (1, 1.27)    |                  |              | 0.99    | (0.68, 1.44) |



|                                                                                     | 30-readmission |        |                |              | 30-day mortality |        |                |              |
|-------------------------------------------------------------------------------------|----------------|--------|----------------|--------------|------------------|--------|----------------|--------------|
|                                                                                     | <u>Model 1</u> |        | <u>Model 2</u> |              | <u>Model 1</u>   |        | <u>Model 2</u> |              |
|                                                                                     | aOR            | 95% CI | aOR            | 95% CI       | aOR              | 95% CI | aOR            | 95% CI       |
| <b>Critical access hospital</b>                                                     |                |        |                |              |                  |        |                |              |
| No                                                                                  |                |        | REF            |              |                  |        | REF            |              |
| Yes                                                                                 |                |        | 1.21           | (0.91, 1.59) |                  |        | 1.13           | (0.55, 2.35) |
| <b>NCI-designated cancer center</b>                                                 |                |        |                |              |                  |        |                |              |
| No                                                                                  |                |        | REF            |              |                  |        | REF            |              |
| Yes                                                                                 |                |        | 1.01           | (0.89, 1.14) |                  |        | 0.64           | (0.42, 0.98) |
| <sup>a</sup> Range 0-25, with higher scores indicating greater co-morbidity burden. |                |        |                |              |                  |        |                |              |
| <sup>b</sup> Arranged with the hospital at least 24 hours prior to the admission    |                |        |                |              |                  |        |                |              |

**eTable 5.** Estimates of the Random Effects Standard Deviation (SD), Median Odds Ratio and Hospital Odds Ratio<sup>a</sup> Based on Hierarchical Logistic Regression Analyses of In-Hospital Mortality and 30- and 90-Day Post-Discharge Readmission and Mortality

|                                  |  | <b>Patient and census-based characteristics only</b> |               |  | <b>Patient, census-based and hospital-specific characteristics</b> |               |
|----------------------------------|--|------------------------------------------------------|---------------|--|--------------------------------------------------------------------|---------------|
|                                  |  | <b>Estimate</b>                                      | <b>95% CI</b> |  | <b>Estimate</b>                                                    | <b>95% CI</b> |
| <b>In-hospital mortality</b>     |  |                                                      |               |  |                                                                    |               |
| Random effects SD                |  | 0.24                                                 | (0.14, 0.34)  |  | 0.11                                                               | (0.00, 0.29)  |
| Median odds ratio                |  | 1.26                                                 | (1.15, 1.39)  |  | 1.11                                                               | (0.94, 1.31)  |
| Hospital odds ratio <sup>a</sup> |  | 1.62                                                 | (1.33, 1.98)  |  | 1.24                                                               | (0.87, 1.77)  |
| <b>30-day readmission</b>        |  |                                                      |               |  |                                                                    |               |
| Random effects SD                |  | 0.14                                                 | (0.11, 0.18)  |  | 0.13                                                               | (0.09, 0.16)  |
| Median odds ratio                |  | 1.15                                                 | (1.11, 1.18)  |  | 1.13                                                               | (1.09, 1.16)  |
| Hospital odds ratio <sup>a</sup> |  | 1.33                                                 | (1.24, 1.43)  |  | 1.29                                                               | (1.21, 1.38)  |
| <b>30-day mortality</b>          |  |                                                      |               |  |                                                                    |               |
| Random effects SD                |  | 0.30                                                 | (0.18, 0.43)  |  | 0.25                                                               | (0.12, 0.38)  |
| Median odds ratio                |  | 1.34                                                 | (1.19, 1.50)  |  | 1.27                                                               | (1.12, 1.44)  |
| Hospital odds ratio <sup>a</sup> |  | 1.84                                                 | (1.44, 2.34)  |  | 1.66                                                               | (1.28, 2.15)  |
| <b>90-day readmission</b>        |  |                                                      |               |  |                                                                    |               |
| Random effects SD                |  | 0.18                                                 | (0.16, 0.21)  |  | 0.17                                                               | (0.14, 0.20)  |
| Median odds ratio                |  | 1.19                                                 | (1.16, 1.22)  |  | 1.17                                                               | (1.15, 1.20)  |
| Hospital odds ratio <sup>a</sup> |  | 1.45                                                 | (1.37, 1.53)  |  | 1.40                                                               | (1.33, 1.48)  |

|                                                                                                                                                                                      | <b>Patient and census-based characteristics only</b> |               | <b>Patient, census-based and hospital-specific characteristics</b> |               |
|--------------------------------------------------------------------------------------------------------------------------------------------------------------------------------------|------------------------------------------------------|---------------|--------------------------------------------------------------------|---------------|
|                                                                                                                                                                                      | <b>Estimate</b>                                      | <b>95% CI</b> | <b>Estimate</b>                                                    | <b>95% CI</b> |
| <b>90-day mortality</b>                                                                                                                                                              |                                                      |               |                                                                    |               |
| Random effects SD                                                                                                                                                                    | 0.26                                                 | (0.18, 0.33)  | 0.23                                                               | (0.15, 0.31)  |
| Median odds ratio                                                                                                                                                                    | 1.28                                                 | (1.19, 1.38)  | 1.25                                                               | (1.16, 1.34)  |
| Hospital odds ratio <sup>a</sup>                                                                                                                                                     | 1.68                                                 | (1.44, 1.95)  | 1.58                                                               | (1.36, 1.85)  |
| <sup>a</sup> Odds ratio comparing risk of the outcome between a hospital one standard deviation above the (statewide) average to a hospital one standard deviation below the average |                                                      |               |                                                                    |               |
